# Supplementary material for: Experimental and computational study of the interplay between C–H/π and anion–π interactions
Source: Royal Society of Chemistry journal article supplement (doi:10.1039/b915794h), 2009-11-18
Supplement: b915794h.pdf [file b915794h.pdf]

Table S1. Data for hydrogen bonds present in **3**, **4** and **5**.

| Complex  | Axis         | Hydrogen bonds                    |            |              |                    |              |
|----------|--------------|-----------------------------------|------------|--------------|--------------------|--------------|
|          |              | D–H...A                           | d(D–H) / Å | d(D...H) / Å | $\alpha$ (DHA) / ° | d(D...A) / Å |
| <b>3</b> | <i>a</i>     | C–H(21A)...F(8)B(2)F <sub>3</sub> | 0.971      | 3.207        | 109.35             | 2.752        |
|          |              | C–H(23B)...F(7)B(2)F <sub>3</sub> | 0.970      | 3.203        | 101.21             | 2.870        |
|          |              | C–H(6B)...F(2)B(1)F <sub>3</sub>  | 0.969      | 3.275        | 124.24             | 2.630        |
|          |              | C–H(8B)...F(1)B(1)F <sub>3</sub>  | 0.970      | 3.271        | 107.09             | 2.852        |
|          | <i>b</i>     | C–H(7B)...F(7)B(2)F <sub>3</sub>  | 0.960      | 3.216        | 100.96             | 2.892        |
|          |              | C–H(8A)...F(8)B(2)F <sub>3</sub>  | 0.970      | 3.408        | 151.22             | 2.526        |
|          |              | C–H(18C)...F(3)B(1)F <sub>3</sub> | 0.959      | 3.201        | 152.13             | 2.321        |
|          |              | C–H(23A)...F(1)B(1)F <sub>3</sub> | 0.970      | 3.249        | 133.44             | 2.543        |
|          | <i>c</i>     | C–H(26)...F(7)B(2)F <sub>3</sub>  | 0.930      | 3.265        | 168.20             | 2.349        |
|          |              | C–H(26)...F(5)B(2)F <sub>3</sub>  | 0.930      | 3.388        | 136.14             | 2.656        |
|          |              | C–H(28A)...F(5)B(2)F <sub>3</sub> | 0.959      | 3.410        | 153.89             | 2.522        |
|          | <i>a/b</i>   | C–H(14C)...F(5)B(2)F <sub>3</sub> | 0.961      | 3.308        | 115.82             | 2.775        |
|          | <i>a/b/c</i> | C–H(14A)...F(6)B(2)F <sub>3</sub> | 0.960      | 3.144        | 132.63             | 2.413        |
| <b>5</b> | <i>a</i>     | C–H(29B)...F(3)B(1)F <sub>3</sub> | 0.960      | 3.500        | 135.54             | 2.750        |
|          |              | C–H(11A)...F(2)B(1)F <sub>3</sub> | 0.971      | 3.447        | 123.32             | 2.817        |
|          | <i>b</i>     | C–H(12B)...F(2)B(1)F <sub>3</sub> | 0.960      | 3.152        | 111.97             | 2.665        |
|          |              | C–H(28A)...F(6)B(2)F <sub>3</sub> | 0.971      | 3.178        | 125.05             | 2.519        |
|          |              | C–H(29A)...F(6)B(2)F <sub>3</sub> | 0.961      | 3.094        | 121.06             | 2.487        |
|          |              | C–H(14A)...F(6)B(2)F <sub>3</sub> | 0.930      | 3.944        | 171.27             | 3.023        |
|          | <i>c</i>     | C–H(17A)...F(8)B(2)F <sub>3</sub> | 0.961      | 3.298        | 155.34             | 2.401        |
|          |              | C–H(4A)...F(5)B(2)F <sub>3</sub>  | 0.960      | 3.624        | 148.38             | 2.772        |
|          |              | C–H(4A)...F(7)B(2)F <sub>3</sub>  | 0.960      | 3.344        | 148.11             | 2.490        |
|          |              | C–H(5C)...F(4)B(1)F <sub>3</sub>  | 0.960      | 3.224        | 144.78             | 2.392        |
|          | <i>a/b</i>   | C–H(9B)...F(7)B(2)F <sub>3</sub>  | 0.971      | 3.256        | 132.55             | 2.520        |

|   |            |                                 |       |       |        |       |
|---|------------|---------------------------------|-------|-------|--------|-------|
|   |            | C–H(29C)⋯F(2)B(1)F <sub>3</sub> | 0.960 | 3.483 | 116.01 | 2.750 |
|   | <i>a/c</i> | C–H(10A)⋯F(6)B(2)F <sub>3</sub> | 0.961 | 3.541 | 114.68 | 3.039 |
|   |            | C–H(10C)⋯F(5)B(2)F <sub>3</sub> | 0.959 | 3.534 | 139.01 | 2.754 |
|   |            | C–H(22A)⋯F(5)B(2)F <sub>3</sub> | 0.960 | 3.137 | 124.80 | 2.488 |
|   |            | C–H(22C)⋯F(7)B(2)F <sub>3</sub> | 0.961 | 3.270 | 107.00 | 2.857 |
|   |            |                                 |       |       |        |       |
| 4 | <i>a</i>   | C–H(11C)⋯F(5)B(2)F <sub>3</sub> | 0.980 | 3.412 | 125.06 | 2.753 |
|   |            | C–H(9)⋯F(8)B(2)F <sub>3</sub>   | 0.949 | 3.220 | 141.14 | 2.426 |
|   |            | C–H(25)⋯F(6)B(2)F <sub>3</sub>  | 0.950 | 3.249 | 140.75 | 2.457 |
|   |            | C–H(27C)⋯F(7)B(2)F <sub>3</sub> | 0.980 | 3.308 | 130.78 | 2.583 |
|   | <i>b</i>   | C–H(17)⋯F(2)B(1)F <sub>3</sub>  | 0.951 | 3.922 | 148.21 | 3.082 |
|   |            | C–H(31A)⋯F(1)B(1)F <sub>3</sub> | 0.989 | 3.160 | 134.20 | 2.390 |
|   |            | C–H(31B)⋯F(2)B(1)F <sub>3</sub> | 0.992 | 3.357 | 132.36 | 2.607 |
|   | <i>c</i>   | C–H(17)⋯F(3)B(1)F <sub>3</sub>  | 0.951 | 3.411 | 162.18 | 2.493 |
|   |            | C–H(23)⋯F(3)B(1)F <sub>3</sub>  | 0.950 | 3.228 | 121.68 | 2.626 |
|   |            | C–H(18)⋯F(7)B(2)F <sub>3</sub>  | 0.949 | 3.136 | 115.45 | 2.609 |
|   |            | C–H(19)⋯F(5)B(2)F <sub>3</sub>  | 0.950 | 3.335 | 145.71 | 2.507 |
|   |            | C–H(9)⋯F(5)B(2)F <sub>3</sub>   | 0.949 | 3.570 | 162.47 | 2.653 |
|   |            | C–H(2)⋯F(5)B(2)F <sub>3</sub>   | 0.949 | 3.203 | 123.32 | 2.582 |
|   |            | C–H(25)⋯F(6)B(2)F <sub>3</sub>  | 0.950 | 3.249 | 140.75 | 2.457 |
|   |            | C–H(19)⋯F(7)B(2)F <sub>3</sub>  | 0.950 | 3.578 | 161.12 | 2.666 |

Table S2. CH- $\pi$  interactions present in **3** and **5**, not indicated in Table 2 of the manuscript.

| Complex  | Axis     | CH- $\pi$ interactions |                                    |                                   |                  |                                  |
|----------|----------|------------------------|------------------------------------|-----------------------------------|------------------|----------------------------------|
|          |          | CH- $\pi$              | $d_{\text{CH-centr}} / \text{\AA}$ | $d_{\text{CH-atom}} / \text{\AA}$ | $\beta / ^\circ$ | $D_{\text{offset}} / \text{\AA}$ |
| <b>3</b> | <i>a</i> | C(11)H-pz(N5)          | 2.574                              | 2.746 (N5)                        | 3.91             | 0.176                            |
|          | <i>c</i> | C(28)H-pz(N7)          | 2.682                              | 2.829(C)                          | 8.43             | 0.393                            |
| <b>5</b> | <i>a</i> | C(21)H-pz(N15)         | 2.850                              | 2.991(N15)                        | 4.55             | 0.226                            |
|          | <i>c</i> | C(17)H-pz(N7)          | 2.780                              | 2.852(C15)                        | 9.73             | 0.470                            |

### RI-MP2 and CCSD(T) Energies (in Hartree) and XYZ coordinates (in angstrom) of CH<sub>4</sub>, BF<sub>4</sub><sup>-</sup> and compounds 6-20

#### CH<sub>4</sub>

RI-MP2/AVTZ Energy -40.432967

CCSD(T)/AVTZ' Energy -40.440161                      -40.440404                      -40.440627

CCSD(T)/AVTZ Energy -40.440845

XYZ coordinates

C 0.0000 0.0000 0.0000

H -0.6259 -0.6259 -0.6259

H 0.6259 0.6259 -0.6259

H -0.6259 0.6259 0.6259

H 0.6259 -0.6259 0.6259

#### BF<sub>4</sub><sup>-</sup>

RI-MP2/AVTZ Energy -424.140222

CCSD(T)/AVTZ' Energy -424.073420                      -424.081870                      -424.089670

CCSD(T)/AVTZ Energy -424.096654

XYZ coordinates

B 0.0000 0.0000 0.0000

F -0.8114 0.8114 0.8114

F 0.8114 -0.8114 0.8114

F -0.8114 -0.8114 -0.8114

F 0.8114 0.8114 -0.8114

### Compound 6

RI-MP2/AVTZ Energy -279.954671  
CCSD(T)/AVTZ' Energy -279.913842  
CCSD(T)/AVTZ Energy -279.915141

XYZ coordinates

C -0.6928 -1.2005 0.2450  
N -1.3862 -0.0001 -0.2447  
C -0.6931 1.2007 0.2446  
N 0.6932 1.2007 -0.2453  
C 1.3865 0.0003 0.2443  
N 0.6934 -1.2005 -0.2449  
H -0.6930 1.2011 1.3346  
H -0.6927 -1.2006 1.3350  
H 1.3871 0.0005 1.3343

### Compound 7

RI-MP2/AVTZ Energy -1426.506274  
CCSD(T)/AVTZ' Energy -2977.861766

XYZ coordinates

C 0.0000 0.0000 -3.6024  
N 1.1850 0.0000 -2.9967  
C 1.1354 0.0000 -1.6745  
N 0.0000 0.0000 -0.9731  
C -1.1354 0.0000 -1.6745  
N -1.1850 0.0000 -2.9967  
H 0.0000 0.0000 -4.6810  
H 2.0534 0.0000 -1.1062  
H -2.0534 0.0000 -1.1062  
Zn 0.0000 0.0000 1.0966  
Cl -2.0326 0.0000 1.6407  
Cl 2.0326 0.0000 1.6407

### Compound 8

|                                  |                            |
|----------------------------------|----------------------------|
| RI-MP2/AVTZ Energy -320.391910   | BSSE corrected -320.389235 |
| CCSD(T)/AVTZ' Energy -320.356102 | BSSE corrected -320.355036 |
| CCSD(T)/AVTZ Energy -320.358882  | BSSE corrected -320.357043 |

XYZ coordinates

C 0.6453 1.1176 -0.5781  
N 1.3660 0.0000 -0.5793  
C 0.6453 -1.1176 -0.5781

N -0.6830 -1.1830 -0.5793  
C -1.2905 0.0000 -0.5781  
N -0.6830 1.1830 -0.5793  
H 1.1850 2.0526 -0.5792  
H 1.1850 -2.0526 -0.5792  
H -2.3701 0.0000 -0.5792  
H 0.5117 0.8863 3.2840  
C 0.0000 0.0000 2.9252  
H 0.0000 0.0000 1.8422  
H -1.0234 0.0000 3.2840  
H 0.5117 -0.8863 3.2840

### Compound 9

RI-MP2/AVTZ Energy -320.392706      BSSE corrected -320.390354  
CCSD(T)/AVTZ' Energy -320.357532      BSSE corrected -320.356595

XYZ coordinates

C 0.6784 -1.2533 0.0000  
N 0.6155 -0.6492 1.1828  
C 0.4775 0.6716 1.1173  
N 0.4030 1.3885 0.0000  
C 0.4775 0.6716 -1.1173  
N 0.6155 -0.6492 -1.1828  
H 0.7909 -2.3270 0.0000  
H 0.4208 1.2084 2.0521  
H 0.4208 1.2084 -2.0521  
H -2.3012 -0.5856 0.8860  
C -2.7518 -0.1515 0.0000  
H -2.3012 -0.5856 -0.8860  
H -3.8163 -0.3590 0.0000  
H -2.5922 0.9213 0.0000

### Compound 10

RI-MP2/AVTZ Energy -320.392180      BSSE corrected -320.389916  
CCSD(T)/AVTZ' Energy -320.357094      BSSE corrected -320.356202

XYZ coordinates

C 1.2899 -0.5526 0.0000  
N 0.6828 -0.5528 1.1828  
C -0.6452 -0.5517 1.1173  
N -1.3659 -0.5517 0.0000  
C -0.6452 -0.5517 -1.1173  
N 0.6828 -0.5528 -1.1828  
H 2.3696 -0.5553 0.0000  
H -1.1850 -0.5536 2.0522  
H -1.1850 -0.5536 -2.0522  
H -0.5108 2.4313 0.8859

C 0.0007 2.7909 0.0000  
H 1.0235 2.4308 0.0000  
H 0.0010 3.8754 0.0000  
H -0.5108 2.4313 -0.8859

### Compound 11

RI-MP2/AVTZ Energy -320.392709      BSSE corrected -320.390352  
CCSD(T)/AVTZ' Energy -320.357529      BSSE corrected -320.356590

XYZ coordinates

C 0.6451 1.1174 -0.5439  
N 1.3658 0.0000 -0.5440  
C 0.6451 -1.1174 -0.5439  
N -0.6829 -1.1828 -0.5440  
C -1.2902 0.0000 -0.5439  
N -0.6829 1.1828 -0.5440  
H 1.1849 2.0522 -0.5435  
H 1.1849 -2.0522 -0.5435  
H -2.3697 0.0000 -0.5435  
H 1.0231 0.0000 2.3883  
C 0.0000 0.0000 2.7487  
H -0.5115 0.8860 2.3883  
H 0.0000 0.0000 3.8332  
H -0.5115 -0.8860 2.3883

### Compound 12

RI-MP2/AVTZ Energy -704.106053      BSSE corrected -704.103363  
CCSD(T)/AVTZ' Energy -703.997517      BSSE corrected -703.995598  
CCSD(T)/AVTZ Energy -704.021317      BSSE corrected -704.020043

XYZ coordinates

C -0.6458 2.1303 1.1185  
N -1.3725 2.1382 0.0000  
C -0.6458 2.1303 -1.1185  
N 0.6862 2.1385 -1.1887  
C 1.2915 2.1303 0.0000  
N 0.6862 2.1385 1.1887  
H -1.1872 2.1193 2.0562  
H -1.1872 2.1193 -2.0562  
H 2.3743 2.1192 0.0000  
F 1.3295 -2.4613 0.0000  
F -0.6646 -2.4617 1.1513  
F -0.6646 -2.4617 -1.1513  
F -0.0003 -0.5835 0.0000  
B 0.0000 -2.0018 0.0000

### Compound 13

RI-MP2/AVTZ Energy -704.108164      BSSE corrected -704.104355

CCSD(T)/AVTZ' Energy -704.007736      BSSE corrected -704.005205

XYZ coordinates

C -1.7104 0.6857 1.1152  
N -1.5464 1.3868 0.0000  
C -1.7104 0.6857 -1.1152  
N -2.0702 -0.5925 -1.1835  
C -2.2360 -1.1717 0.0000  
N -2.0702 -0.5925 1.1835  
H -1.5439 1.1997 2.0484  
H -1.5439 1.1997 -2.0484  
H -2.5359 -2.2094 0.0000  
F 0.9531 -0.0428 -1.1456  
F 0.9531 -0.0428 1.1456  
F 2.5472 -1.2293 0.0000  
F 2.6040 1.0652 0.0000  
B 1.7748 -0.0621 0.0000

**Compound 14**

RI-MP2/AVTZ Energy -704.109782      BSSE corrected -704.105206  
CCSD(T)/AVTZ' Energy -704.016542      BSSE corrected -704.013795

XYZ coordinates

C -0.6436 1.1148 -1.7194  
N -1.3657 0.0000 -1.7300  
C -0.6436 -1.1148 -1.7194  
N 0.6828 -1.1827 -1.7300  
C 1.2873 0.0000 -1.7194  
N 0.6828 1.1827 -1.7300  
H -1.1830 2.0490 -1.7042  
H -1.1830 -2.0490 -1.7042  
H 2.3660 0.0000 -1.7042  
F -0.6617 1.1461 1.1404  
F -0.6617 -1.1461 1.1404  
F 0.0000 0.0000 3.0165  
F 1.3234 0.0000 1.1404  
B 0.0000 0.0000 1.6186

**Compound 15**

RI-MP2/AVTZ Energy -704.106016      BSSE corrected -704.102732  
CCSD(T)/AVTZ' Energy -704.013064      BSSE corrected -704.011025

XYZ coordinates

C 1.2880 1.8609 0.0000  
N 0.6832 1.8687 -1.1830  
C -0.6437 1.8624 -1.1153  
N -1.3658 1.8701 0.0000

C -0.6437 1.8624 1.1153  
N 0.6832 1.8687 1.1830  
H 2.3671 1.8500 0.0000  
H -1.1833 1.8527 -2.0498  
H -1.1833 1.8527 2.0498  
F 0.6615 -1.2725 1.1454  
F 0.6615 -1.2725 -1.1454  
F -0.0014 -3.1493 0.0000  
F -1.3224 -1.2708 0.0000  
B -0.0001 -1.7487 0.0000

### Compound 16

RI-MP2/AVTZ Energy -744.544187

BSSE corrected -744.538222

CCSD(T)/AVTZ' Energy -744.440447

BSSE corrected -744.437100

#### XYZ coordinates

C -0.6520 1.5796 1.1147  
N -1.3742 1.5819 0.0000  
C -0.6520 1.5796 -1.1147  
N 0.6744 1.6000 -1.1827  
C 1.2787 1.5967 0.0000  
N 0.6744 1.6000 1.1827  
H -1.1917 1.5645 2.0500  
H -1.1917 1.5645 -2.0500  
H 2.3588 1.5960 0.0000  
F -0.6608 -2.8934 1.1475  
F 0.0136 -1.0273 0.0000  
F -0.6608 -2.8934 -1.1475  
F 1.3268 -2.9062 0.0000  
B 0.0047 -2.4411 0.0000  
H -0.9888 5.5305 0.0000  
C 0.0171 5.1238 0.0000  
H 0.5453 5.4583 -0.8866  
H -0.0329 4.0422 0.0000  
H 0.5453 5.4583 0.8866

### Compound 17

RI-MP2/AVTZ Energy -744.548355

BSSE corrected -744.541148

CCSD(T)/AVTZ' Energy -744.460702

BSSE corrected -744.456996

#### XYZ coordinates

C -0.6434 1.1144 0.0244  
N -1.3655 0.0000 0.0140  
C -0.6434 -1.1144 0.0244  
N 0.6828 -1.1826 0.0140  
C 1.2868 0.0000 0.0244  
N 0.6828 1.1826 0.0140  
H -1.1831 2.0492 0.0401



H -1.1831 -2.0492 0.0401  
H 2.3662 0.0000 0.0401  
B 0.0000 0.0000 3.3596  
F 1.3232 0.0000 2.8809  
F -0.6616 1.1459 2.8809  
F -0.6616 -1.1459 2.8809  
F 0.0000 0.0000 4.7571  
H -1.0203 0.0000 -3.0359  
C 0.0000 0.0000 -3.4034  
H 0.5101 0.8836 -3.0359  
H 0.0000 0.0000 -4.4891  
H 0.5101 -0.8836 -3.0359

### Compound 18

RI-MP2/AVTZ Energy -1466.944461      BSSE corrected -1466.941188

CCSD(T)/AVTZ' Energy -3018.304810      BSSE corrected -3018.303195

#### XYZ coordinates

C 0.8112 -3.3537 0.0000  
N 0.7098 -2.7567 -1.1851  
C 0.4883 -1.4531 -1.1356  
N 0.3710 -0.7623 0.0000  
C 0.4883 -1.4531 1.1356  
N 0.7098 -2.7567 1.1851  
H 0.9920 -4.4176 0.0000  
H 0.3931 -0.8924 -2.0539  
H 0.3931 -0.8924 2.0539  
Zn 0.0248 1.2754 0.0000  
Cl -0.0666 1.8132 2.0325  
Cl -0.0666 1.8132 -2.0325  
H -3.2581 -2.2095 -0.8868  
C -2.8208 -2.6550 0.0000  
H -3.2581 -2.2095 0.8868  
H -1.7526 -2.4772 0.0000  
H -3.0045 -3.7237 0.0000

### Compound 19

RI-MP2/AVTZ Energy -1850.675334      BSSE corrected -1850.671291

CCSD(T)/AVTZ' Energy -3401.963607      BSSE corrected -3401.960507

#### XYZ coordinates

C 1.5622 -2.7430 0.0000  
N 1.0948 -2.3645 -1.1851  
C 0.0829 -1.5190 -1.1342  
N -0.4493 -1.0634 0.0000  
C 0.0829 -1.5190 1.1342  
N 1.0948 -2.3645 1.1851

H 2.3902 -3.4345 0.0000  
H -0.3570 -1.1608 -2.0524  
H -0.3570 -1.1608 2.0524  
Zn -1.9914 0.2244 0.0000  
Cl -2.5244 0.6891 1.9997  
Cl -2.5244 0.6891 -1.9997  
F 2.2818 2.2622 0.0000  
B 3.0380 1.0866 0.0000  
F 3.8309 1.0118 1.1468  
F 2.1370 -0.0175 0.0000  
F 3.8309 1.0118 -1.1468

### Compound 20

RI-MP2/AVTZ Energy -1891.113982      BSSE corrected -1891.106082  
CCSD(T)/AVTZ' Energy -3442.406818      BSSE corrected -3442.401916

### XYZ coordinates

C 1.2878 -2.7113 0.0000  
N 0.8768 -2.2725 -1.1854  
C -0.0102 -1.2962 -1.1344  
N -0.4746 -0.7726 0.0000  
C -0.0102 -1.2962 1.1344  
N 0.8768 -2.2725 1.1854  
H 2.0140 -3.5101 0.0000  
H -0.3970 -0.8812 -2.0532  
H -0.3970 -0.8812 2.0532  
Zn -1.8255 0.7135 0.0000  
Cl -2.2878 1.2444 2.0007  
Cl -2.2878 1.2444 -2.0007  
H -2.7760 -3.9807 -0.8868  
C -2.1675 -4.1221 0.0000  
H -2.7760 -3.9807 0.8868  
H -1.3618 -3.3993 0.0000  
H -1.7489 -5.1228 0.0000  
F 2.6840 2.1469 0.0000  
B 3.2665 0.8758 0.0000  
F 4.0403 0.6890 1.1470  
F 2.2175 -0.0887 0.0000  
F 4.0403 0.6890 -1.1470
